# Supplementary material
Source: PubMed Central journal article supplement (PMC9743483)

Fig. S1

Ponceau S total protein stain

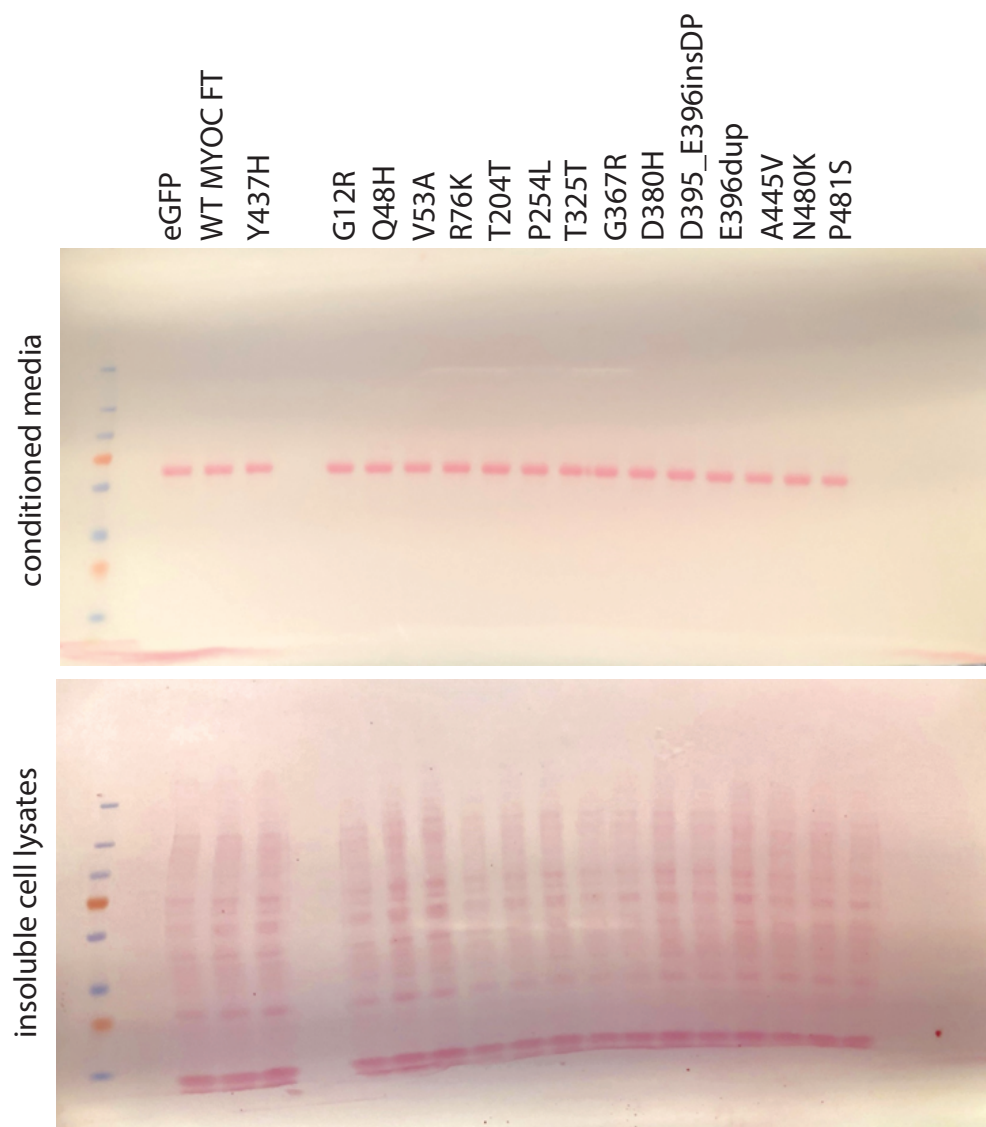

Supplement: NIHMS1853415-supplement-Supp_2.pdf [file NIHMS1853415-supplement-Supp_2.pdf]

Fig. S2

A

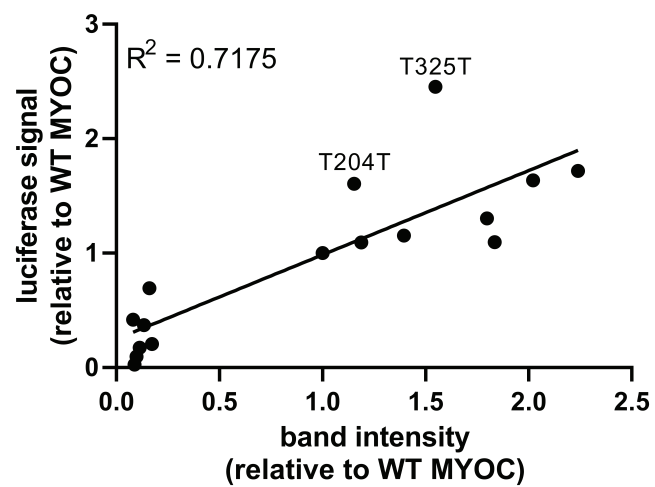

B

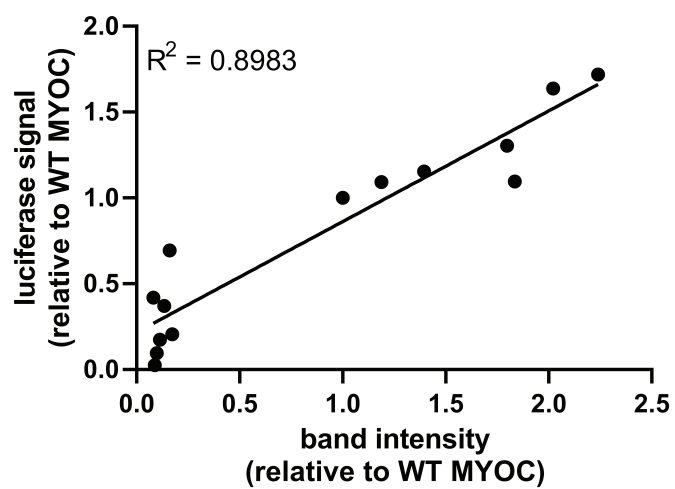

Supplement: NIHMS1853415-supplement-Supp_3.pdf [file NIHMS1853415-supplement-Supp_3.pdf]
